# Supplementary material for: Fluorescence response of cruciform D–π–A–π–D phenothiazine derivatives to mechanical force
Source: Royal Society of Chemistry journal article supplement (doi:10.1039/c9ce00568d), 2019-01-01
Supplement: c9ce00568d1.pdf [file c9ce00568d1.pdf]

**Supporting information for:**

**Fluorescence response of cruciform D- $\pi$ -A- $\pi$ -D phenothiazine derivatives to mechanical force**

Tong Zhang, Chunyu Zhang, Xiaoting Li, Meng Liang, Weixiao Bian, Yan Zhang, kunpeng Wang, Pengchong Xue\*

Tianjin Key Laboratory of Structure and Performance for Functional Molecules, MOE Key Laboratory of Inorganic–Organic Hybrid Functional Material Chemistry, College of Chemistry, Tianjin Normal University, Tianjin 300387, P. R. China  
Email: xuepengchong@126.com; hxyxpc@tjnu.edu.cn

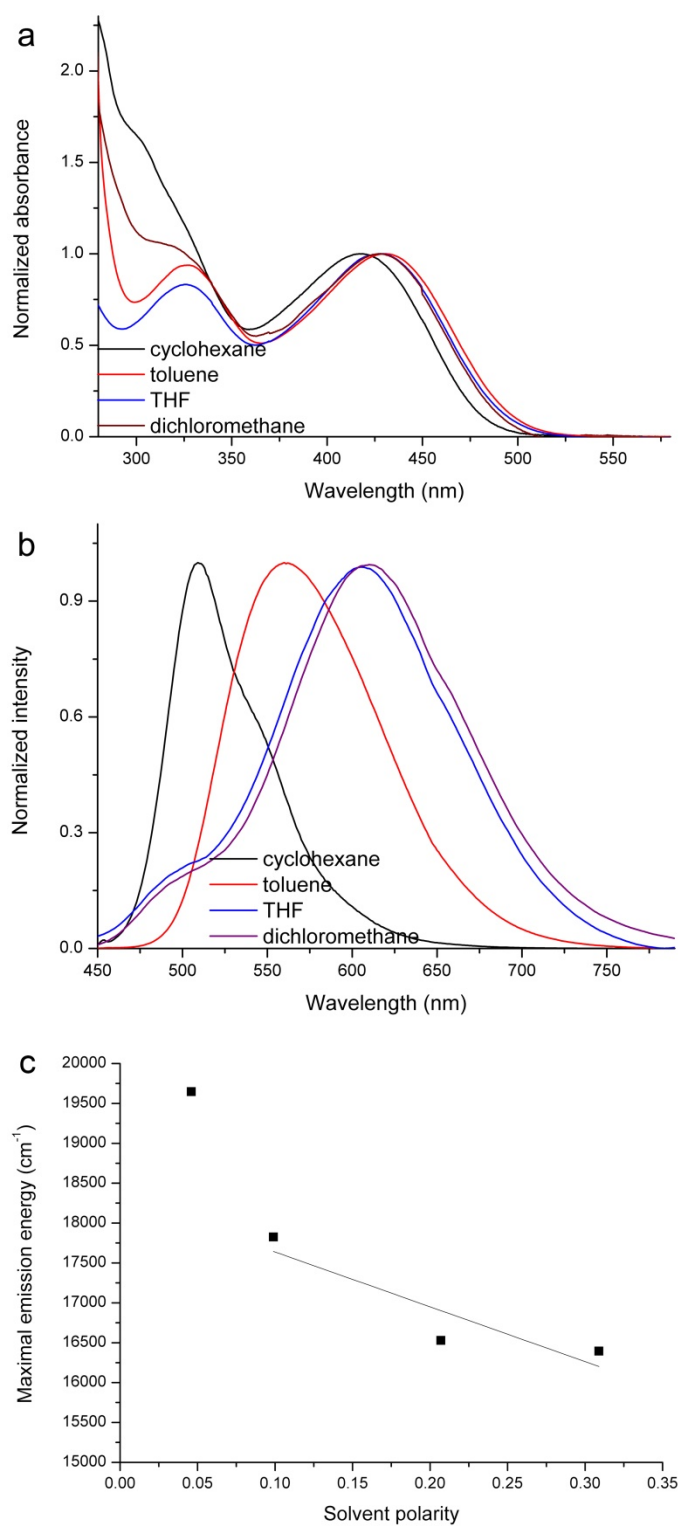

**Fig. S1** (a) Absorption and (b) fluorescence spectra of EPTD in different solvents. c) Lippert–Mataga plot: fluorescence emission maximum energy of EPTD as a function of solvent polarity.  $\lambda_{\text{ex}} = 400 \text{ nm}$ .  $C = 5 \times 10^{-5} \text{ M}$ .

**Table S1.** Photophysical data of EPTD in different solvents.

|                             | Cyclohexane | Toluene | THF | CH <sub>2</sub> Cl <sub>2</sub> |
|-----------------------------|-------------|---------|-----|---------------------------------|
| $\lambda_{\text{abs}}$ (nm) | 417         | 430     | 428 | 428                             |
| $\lambda_{\text{em}}$ (nm)  | 509         | 561     | 605 | 609                             |

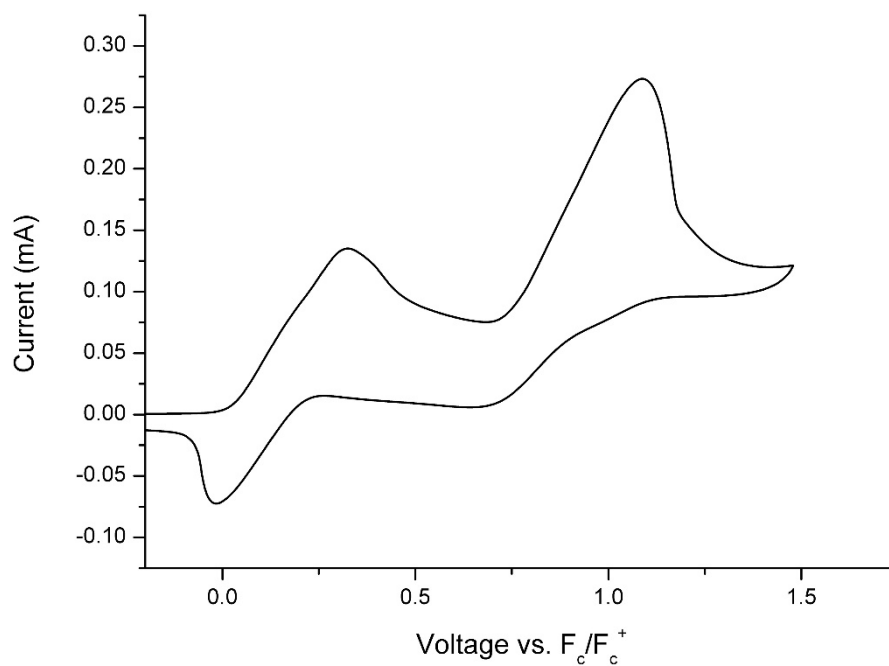

**Fig. S2** Cyclic voltammetry curve of EPTD in dry THF at a scan rate of 0.1V/s.

**Table S2.** Photophysical data of EPTD in THF and energy levels obtained by cyclic voltammogram and quantum chemical calculation based on EPTD-E.

|      | $\lambda_{\text{abs}}^{\text{a}}$ | $\lambda_{\text{onset}}^{\text{a}}$ | $E_{\text{g}}^{\text{b}}$ | HOMO <sup>c</sup> | LUMO <sup>d</sup> | HOMO <sup>e</sup> | LUMO <sup>e</sup> |
|------|-----------------------------------|-------------------------------------|---------------------------|-------------------|-------------------|-------------------|-------------------|
|      | (nm)                              | (nm)                                | (eV)                      | (eV)              | (eV)              | (eV)              | (eV)              |
| EPTD | 325, 417                          | 482                                 | 2.57                      | -4.95             | -2.38             | -4.81             | -2.17             |

<sup>a</sup> Measured in THF ( $10^{-5}$  M); <sup>b</sup>  $E_{\text{g}}$  was determined from the edge of the absorption spectrum. <sup>c</sup> HOMO energy level was obtained by first oxidation peak in DMF with ferrocene/ferrocenium ( $\text{Fc}/\text{Fc}^+$ ) as an internal reference. <sup>d</sup>  $E_{\text{LUMO}} = E_{\text{HOMO}} + E_{\text{g}}$ . <sup>e</sup> DFT calculated at theoretical level of B3LYP/6-31G.

**Table S3.** Photophysical data of EPTD in vacuum obtained by quantum chemical calculation.

|      | Transition            | Transition assignment                                                                                          | E (eV) | $\lambda_{\text{abs}}$<br>(nm) | Oscillator<br>strength |
|------|-----------------------|----------------------------------------------------------------------------------------------------------------|--------|--------------------------------|------------------------|
| EPTD | $S_0 \rightarrow S_1$ | HOMO-2 $\rightarrow$ LUMO (9.2 %)<br>HOMO-1 $\rightarrow$ LUMO+2<br>(3.5 %)<br>HOMO $\rightarrow$ LUMO (82.4%) | 3.0316 | 408.97                         | 1.6087                 |

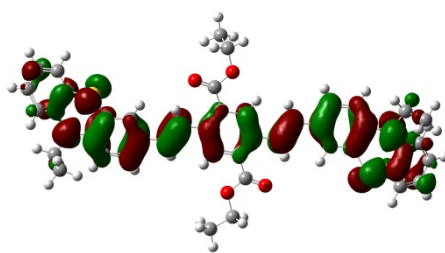

HOMO

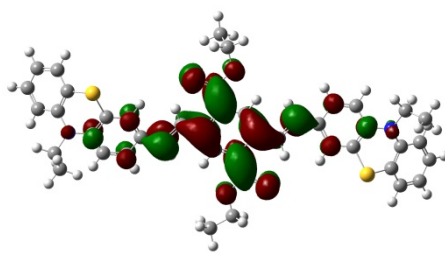

LUMO

**Fig. S3** Frontier orbitals of EPTD optimized in vacuum.

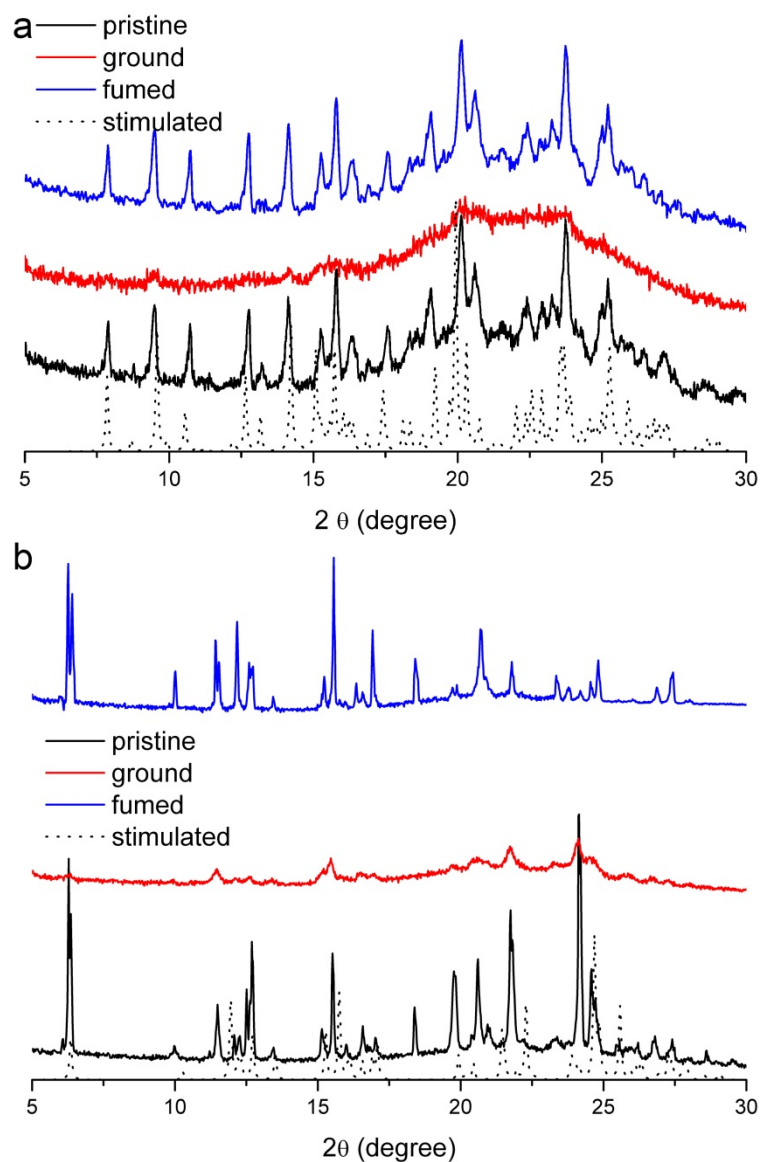

**Fig. S4** XRD patterns of (a) EPTD-Y and (b) EPTD-R in pristine crystals, ground and fumed solids. Dot lines are stimulated XRD patterns.



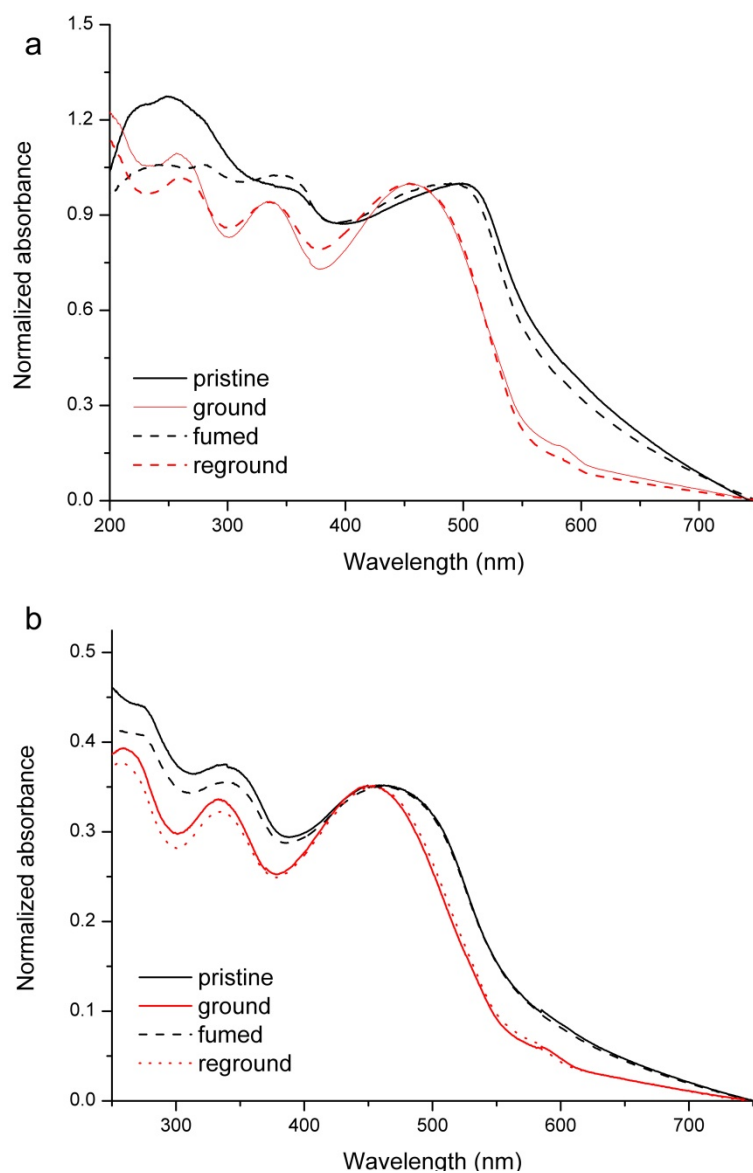

**Fig. S5** UV-Vis absorption spectra of (a) EPTD-Y and (b) EPTD-R in different states.

**Table S4.** Photophysical data of EPTD in Z-form and E-form obtained by quantum chemical calculation.

|        | Dipole moment (Debye) | Transition            | Transition assignment                                                                                         | E (eV) | $\lambda_{\text{abs}}$ (nm) | Oscillator strength |
|--------|-----------------------|-----------------------|---------------------------------------------------------------------------------------------------------------|--------|-----------------------------|---------------------|
| Z-form | 4.79                  | $S_0 \rightarrow S_1$ | HOMO-2 $\rightarrow$ LUMO (9.6 %)<br>HOMO-1 $\rightarrow$ LUMO+2 (7.5 %)<br>HOMO $\rightarrow$ LUMO (73.7 %)  | 3.5384 | 350.39                      | 1.8105              |
| E-form | 0                     | $S_0 \rightarrow S_1$ | HOMO-2 $\rightarrow$ LUMO (12.1 %)<br>HOMO-1 $\rightarrow$ LUMO+2 (5.4 %)<br>HOMO $\rightarrow$ LUMO (75.0 %) | 3.5055 | 353.69                      | 1.4926              |

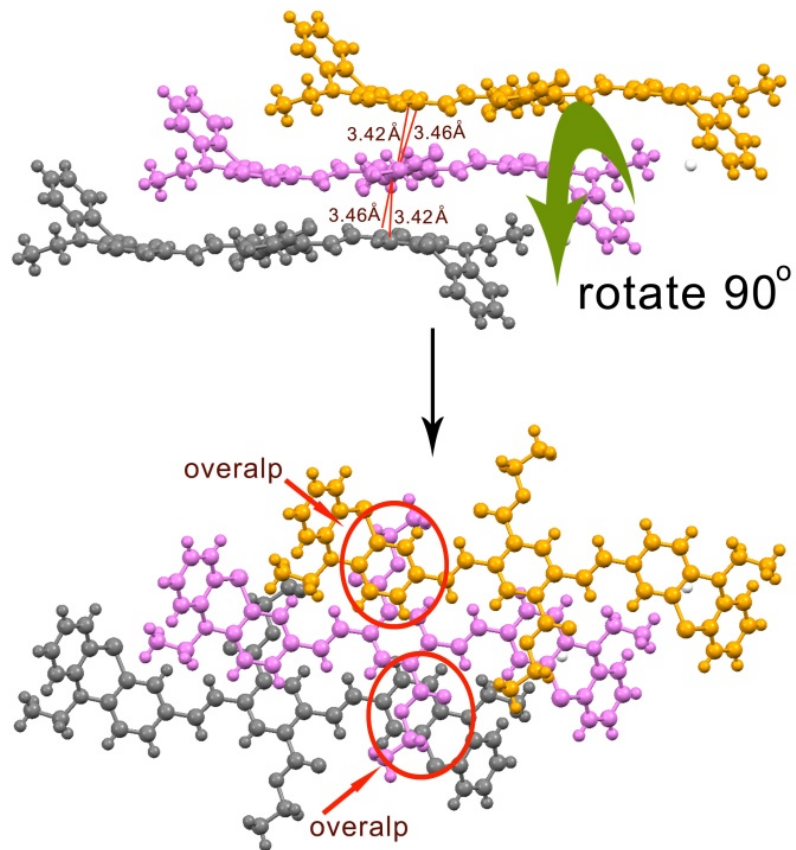

**Fig. S6** Molecular stacking and the interaction between ester groups and phenothiazine moieties in EPTD-R crystal.

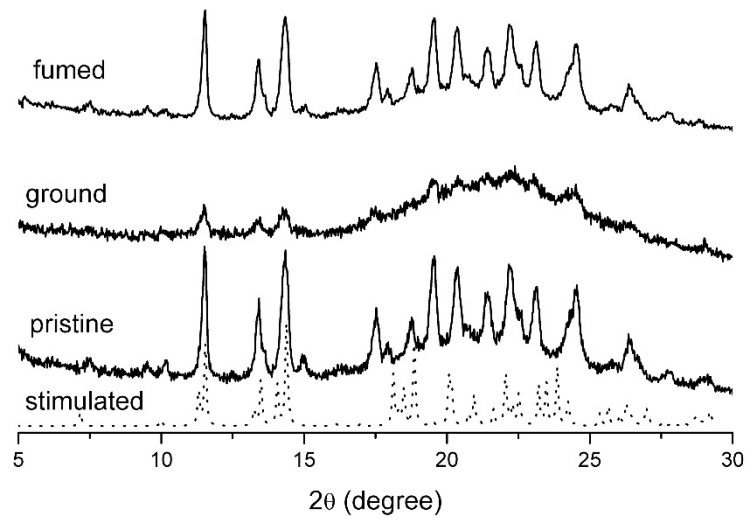

**Fig. S7** XRD patterns of BPTD in different states.

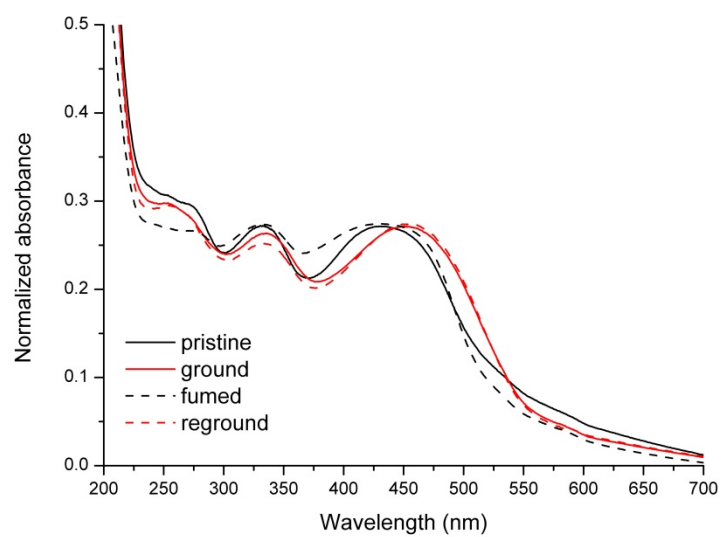

**Fig. S8** UV-Vis absorption spectra of BPTD in different states.
